# Supplementary material
Source: Springer Nature journal article supplement (https://www.springermedizin.de/resource/supplementary/12873_2012_171_MOESM3_ESM.pdf/9431616)

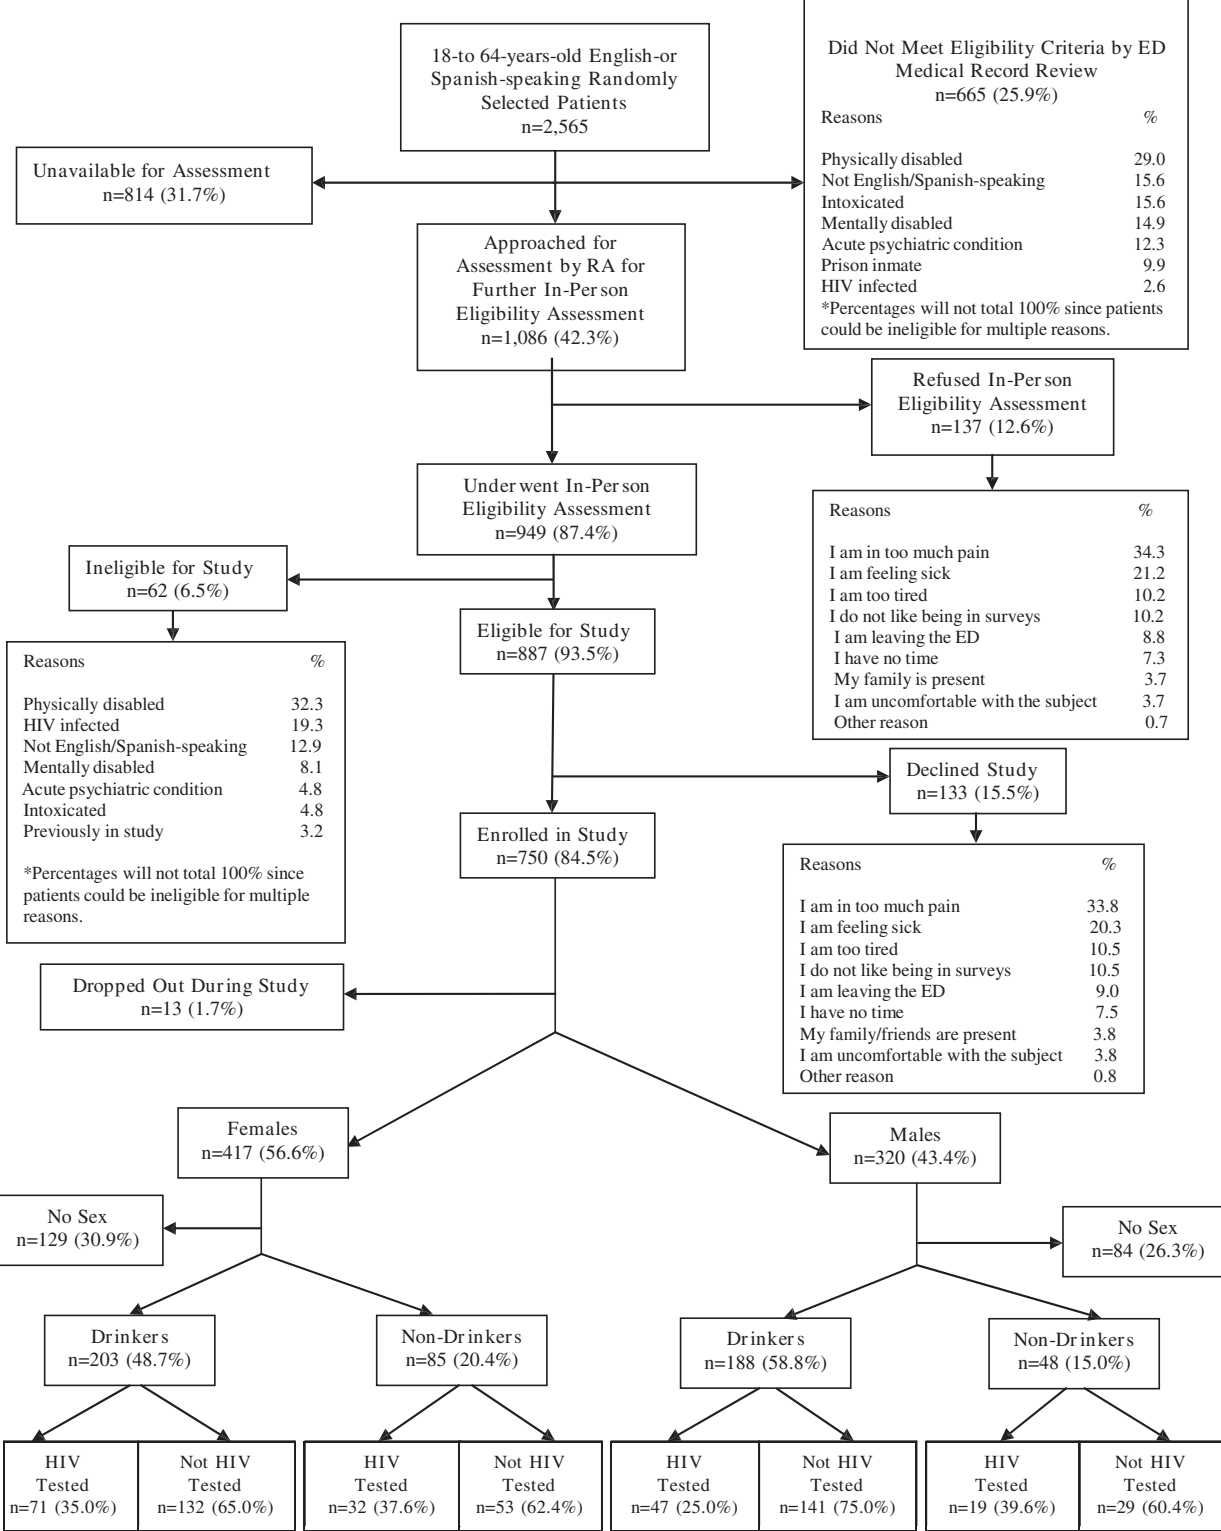

ED= Emergency department; RA=Research assistant; HIV=Human immunodeficiency virus

Supplement: MOESM3 [file 9431616]
